# Supplementary material
Source: Springer Nature journal article supplement (https://www.springermedizin.de/resource/supplementary/13256_2011_1782_MOESM4_ESM.pdf/9648442)

**Caesarean  
section  
scar** →

**Prominent  
isthmic  
portion of  
uterus** →

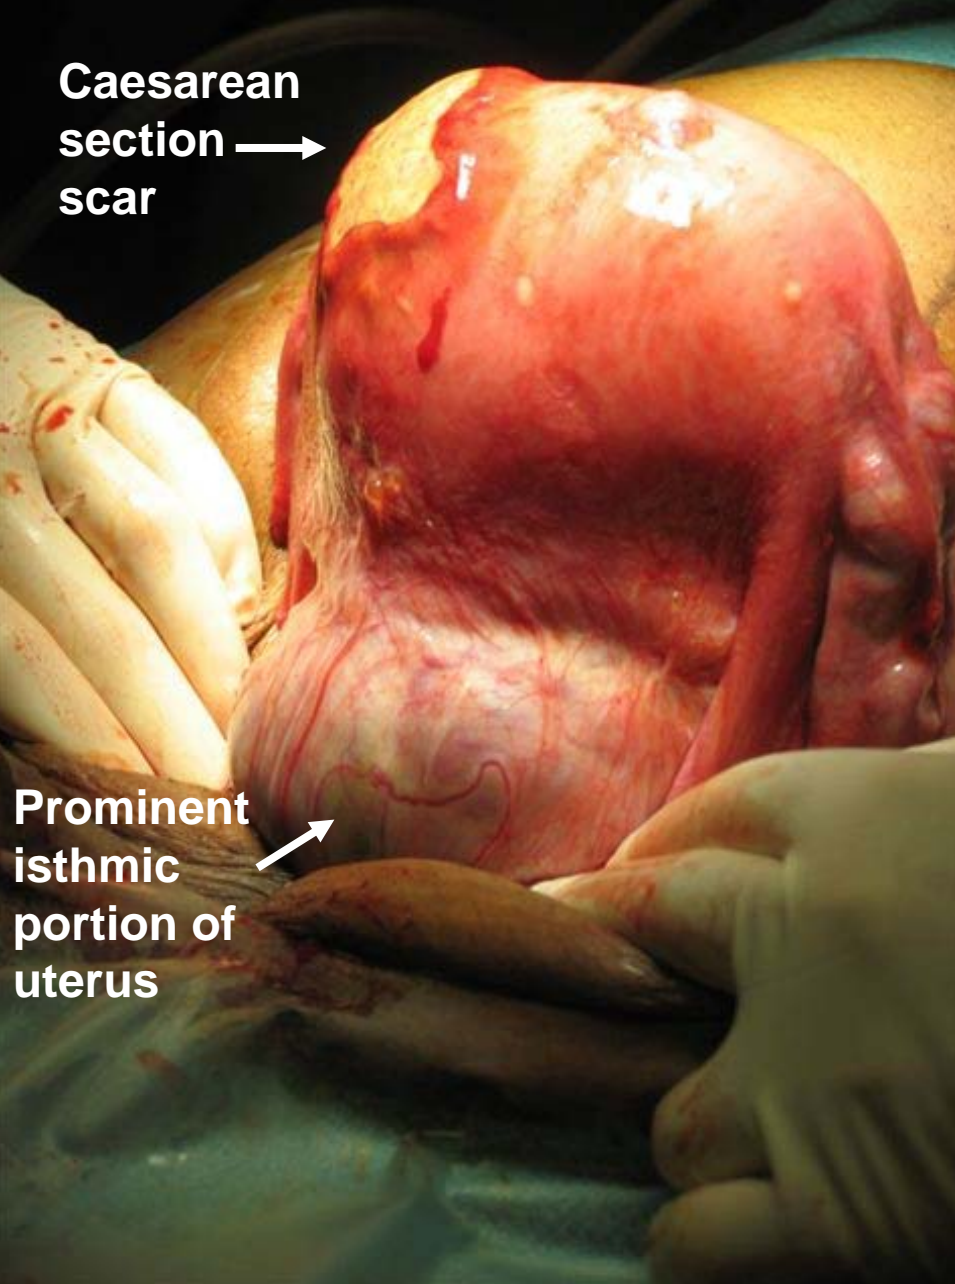

Supplement: MOESM4 [file 9648442]
